# Supplementary material
Source: PubMed Central journal article supplement (PMC3875187)
Supplement: Supp_Fig1.pdf [file Supp_Fig1.pdf]

## Supplementary Data

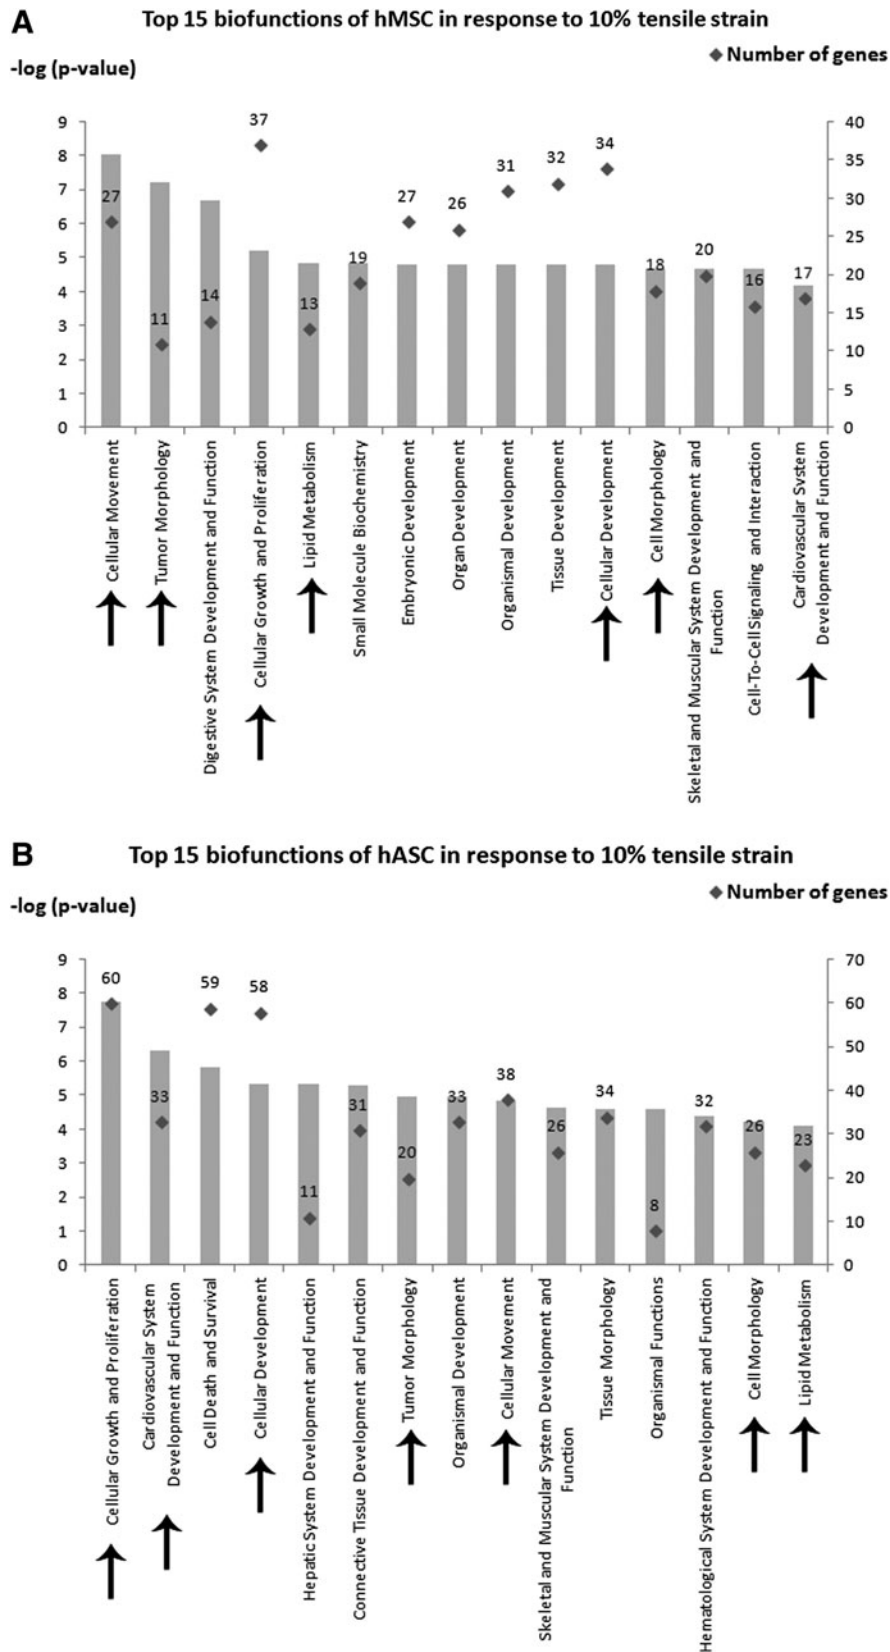

**SUPPLEMENTARY FIG. S1.** Comparative function analysis indicates 10% uniaxial cyclic tensile strain induces expression of genes associated with cellular movement, growth, and proliferation in both hMSC from osteoporotic donors as shown (A); and human adipose-derived stem cells (hASC) from our previous study<sup>19</sup> (B). Seven of the top 15 biofunctions overlap between the two cell types (marked with arrow). Left Y-axis is  $-\log(p\text{-value})$  shown as bar chart. Right Y-axis is number of genes associated with functions shown as diamond (◆) with number.
