# Supplementary material
Source: PubMed Central journal article supplement (PMC3875187)
Supplement: Supp_Fig2.pdf [file Supp_Fig2.pdf]

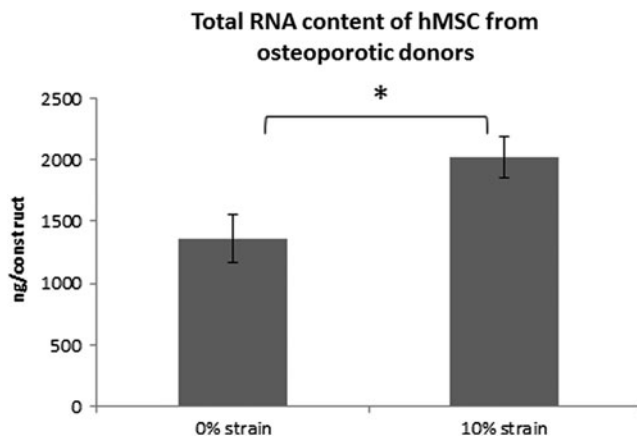

**SUPPLEMENTARY FIG. S2.** Total RNA content of human mesenchymal stem cells (hMSC) from osteoporotic donors after 14-day culture in growth media under 0% or 10% uniaxial cyclic tensile strain. Ten percent tensile strain significantly increased total RNA yield of hMSC from osteoporotic donors by more than 30% ( $*p < 0.05$ ).
