# Supplementary material
Source: PubMed Central journal article supplement (PMC3875187)
Supplement: Supp_Table1.pdf [file Supp_Table1.pdf]

SUPPLEMENTARY TABLE S1. GENES EXPRESSED BY HUMAN MESENCHYMAL STEM CELLS IN THREE-DIMENSIONAL COLLAGEN CULTURE IN RESPONSE TO 10% UNIAXIAL CYCLIC TENSILE STRAIN

| <i>Symbol</i>    | <i>Entrez gene name</i>                                                  | <i>Fold change</i> | <i>p-value</i> |
|------------------|--------------------------------------------------------------------------|--------------------|----------------|
| <i>TBX3</i>      | T-box 3                                                                  | 4.354              | 6.07E-12       |
| <i>CRISPLD2</i>  | Cysteine-rich secretory protein LCCL domain containing 2                 | 2.715              | 1.15E-10       |
| <i>EZR</i>       | Ezrin                                                                    | 2.564              | 5.44E-03       |
| <i>PIK3CD</i>    | Phosphoinositide-3-kinase, catalytic, delta polypeptide                  | 2.515              | 5.46E-11       |
| <i>PMEP1</i>     | Prostate transmembrane protein, androgen induced 1                       | 2.496              | 5.46E-11       |
| <i>PDLIM4</i>    | PDZ and LIM domain 4                                                     | 2.414              | 4.07E-09       |
| <i>HAS2</i>      | Hyaluronan synthase 2                                                    | 2.373              | 6.07E-12       |
| <i>TRIB1</i>     | Tribbles homolog 1 (Drosophila)                                          | 2.338              | 6.07E-12       |
| <i>JARID2</i>    | Jumonji, AT rich interactive domain 2                                    | 2.155              | 1.23E-03       |
| <i>HLX</i>       | H2.0-like homeobox                                                       | 2.062              | 9.42E-03       |
| <i>BHLHE40</i>   | Basic helix-loop-helix family, member e40                                | 1.967              | 5.34E-10       |
| <i>CAMK2N1</i>   | Calcium/calmodulin-dependent protein kinase II inhibitor 1               | 1.93               | 3.58E-03       |
| <i>STMN4</i>     | Stathmin-like 4                                                          | 1.895              | 6.83E-03       |
| <i>MICALL1</i>   | MICAL-like 1                                                             | 1.859              | 3.00E-05       |
| <i>IGF1R</i>     | Insulin-like growth factor 1 receptor                                    | 1.802              | 7.90E-03       |
| <i>UCK2</i>      | Uridine-cytidine kinase 2                                                | 1.774              | 1.00E-04       |
| <i>ADAM12</i>    | ADAM metalloproteinase domain 12                                         | 1.737              | 1.21E-11       |
| <i>FOXD1</i>     | Forkhead box D1                                                          | 1.695              | 5.19E-07       |
| <i>PLAUR</i>     | Plasminogen activator, urokinase receptor                                | 1.694              | 4.15E-03       |
| <i>CLU</i>       | Clusterin                                                                | 1.67               | 3.01E-03       |
| <i>VEGFA</i>     | Vascular endothelial growth factor A                                     | 1.667              | 1.16E-07       |
| <i>LRRFIP1</i>   | Leucine rich repeat (in FLII) interacting protein 1                      | 1.666              | 1.96E-03       |
| <i>MCAM</i>      | Melanoma cell adhesion molecule                                          | 1.664              | 4.80E-06       |
| <i>TNFRSF12A</i> | Tumor necrosis factor receptor superfamily, member 12A                   | 1.63               | 1.66E-07       |
| <i>ZNF281</i>    | Zinc finger protein 281                                                  | 1.63               | 7.03E-03       |
| <i>DLEU2</i>     | Deleted in lymphocytic leukemia 2 (nonprotein coding)                    | 1.617              | 9.00E-05       |
| <i>INSIG1</i>    | Insulin-induced gene 1                                                   | 1.605              | 7.45E-07       |
| <i>DNAJC7</i>    | DnaJ (Hsp40) homolog, subfamily C, member 7                              | 1.584              | 3.33E-03       |
| <i>ARL4C</i>     | ADP-ribosylation factor-like 4C                                          | 1.543              | 3.64E-11       |
| <i>NXN</i>       | Nucleoredoxin                                                            | 1.54               | 1.00E-05       |
| <i>BMP1</i>      | Bone morphogenetic protein 1                                             | 1.513              | 4.85E-03       |
| <i>GGH</i>       | Gamma-glutamyl hydrolase (conjugase, folic polyglutamyl hydrolase)       | 1.51               | 1.00E-03       |
| <i>IRS1</i>      | Insulin receptor substrate 1                                             | 1.502              | 9.90E-07       |
| <i>CHST3</i>     | Carbohydrate (chondroitin 6) sulfotransferase 3                          | 1.461              | 5.50E-04       |
| <i>FSCN1</i>     | Fascin homolog 1, actin-bundling protein (Strongylocentrotus purpuratus) | 1.458              | 9.16E-08       |
| <i>PLAU</i>      | Plasminogen activator, urokinase                                         | 1.448              | 2.00E-05       |
| <i>MELK</i>      | Maternal embryonic leucine zipper kinase                                 | 1.448              | 1.43E-03       |
| <i>RALA</i>      | v-ral simian leukemia viral oncogene homolog A (ras related)             | 1.402              | 6.33E-03       |
| <i>WNT5B</i>     | Wingless-type MMTV integration site family, member 5B                    | 1.397              | 3.04E-03       |
| <i>FXRD5</i>     | FXRD domain containing ion transport regulator 5                         | 1.386              | 6.50E-04       |
| <i>TRMT61A</i>   | tRNA methyltransferase 61 homolog A (S. cerevisiae)                      | 1.386              | 2.20E-07       |
| <i>ITPR3</i>     | Inositol 1,4,5-trisphosphate receptor, type 3                            | 1.385              | 2.51E-03       |
| <i>SGPL1</i>     | Sphingosine-1-phosphate lyase 1                                          | 1.365              | 6.07E-12       |
| <i>LBH</i>       | Limb bud and heart development homolog (mouse)                           | 1.356              | 1.60E-04       |
| <i>JUND</i>      | Jun D proto-oncogene                                                     | 1.351              | 3.89E-06       |
| <i>SERINC5</i>   | Serine incorporator 5                                                    | 1.279              | 1.10E-04       |
| <i>TCF4</i>      | Transcription factor 4                                                   | 1.273              | 8.00E-05       |
| <i>STX4</i>      | Syntaxin 4                                                               | 1.242              | 2.35E-03       |
| <i>MUS81</i>     | MUS81 endonuclease homolog (S. cerevisiae)                               | 1.219              | 4.06E-03       |
| <i>DUSP23</i>    | Dual specificity phosphatase 23                                          | 1.205              | 5.80E-08       |
| <i>ATXN1</i>     | Ataxin 1                                                                 | 1.184              | 3.00E-05       |
| <i>SPTLC2</i>    | Serine palmitoyltransferase, long chain base subunit 2                   | 1.172              | 3.00E-05       |
| <i>NAA15</i>     | N(alpha)-acetyltransferase 15, NatA auxiliary subunit                    | 1.171              | 1.76E-03       |
| <i>RAP1GDS1</i>  | RAP1, GTP-GDP dissociation stimulator 1                                  | 1.162              | 9.90E-04       |
| <i>PVRL3</i>     | Poliovirus receptor-related 3                                            | 1.161              | 2.70E-04       |
| <i>S100BP</i>    | S100P binding protein                                                    | 1.126              | 2.53E-09       |
| <i>PRRX1</i>     | Paired related homeobox 1                                                | -1.125             | 6.07E-12       |
| <i>FZD8</i>      | Frizzled family receptor 8                                               | -1.182             | 9.31E-06       |
| <i>SGSM1</i>     | Small G protein signaling modulator 1                                    | -1.442             | 6.07E-12       |
| <i>LTBP3</i>     | Latent transforming growth factor beta binding protein 3                 | -1.514             | 6.00E-05       |
| <i>SYNPO2</i>    | Synaptodin 2                                                             | -1.567             | 1.23E-06       |
| <i>FST</i>       | Follistatin                                                              | -1.761             | 2.47E-03       |
| <i>PTX3</i>      | Pentraxin 3, long                                                        | -2.216             | 5.00E-05       |
| <i>EFEMP1</i>    | EGF containing fibulin-like extracellular matrix protein 1               | -2.299             | 4.09E-09       |
