# Supplementary material
Source: PubMed Central journal article supplement (PMC3875187)
Supplement: Supp_Table2.pdf [file Supp_Table2.pdf]

SUPPLEMENTARY TABLE S2. MOLECULAR AND CELLULAR FUNCTIONS

| Category                                   | p-Value           | Molecules                                                                                                                                                                                                                                       |
|--------------------------------------------|-------------------|-------------------------------------------------------------------------------------------------------------------------------------------------------------------------------------------------------------------------------------------------|
| Cellular movement                          | 1.04E-08-8.17E-03 | RALA, CLU, TNFRSF12A, VEGFA, TRIB1, SGPL1, MCAM, EZR, STMN4, IGF1R, JUND, FXYD5, WNT5B, PTX3, HLX, FST, PLAUR, ADAM12, BHLHE40, FSCN1, IRS1, HAS2, PIK3CD, PLAU, EFEMP1                                                                         |
| Cellular growth and proliferation          | 4.12E-06-8.17E-03 | TCF4, RALA, INSIG1, CLU, MELK, TNFRSF12A, VEGFA, TRIB1, SGPL1, CAMK2N1, MCAM, PRRX1, EZR, JARID2, IGF1R, JUND, MUS81, WNT5B, BMP1, PTX3, HLX, FST, TBX3, PLAUR, PDLIM4, LTBP3, ADAM12, IRS1, BHLHE40, FSCN1, HAS2, PIK3CD, PLAU, EFEMP1, PMEPA1 |
| Cell-to-cell signaling and interaction     | 4.79E-06-8.17E-03 | PTX3, RALA, PVRL3, CLU, PLAUR, TNFRSF12A, VEGFA, ADAM12, IRS1, IGF1R, HAS2, PIK3CD, STX4, PLAU, FXYD5                                                                                                                                           |
| Carbohydrate metabolism                    | 1.07E-05-8.17E-03 | VEGFA, PTX3, RALA, SERINC5, IRS1, CHST3, IGF1R, PLAUR, HAS2, PIK3CD, STX4, PLAU                                                                                                                                                                 |
| Cellular development                       | 1.33E-05-8.17E-03 | TCF4, RALA, INSIG1, CLU, TNFRSF12A, VEGFA, SGPL1, CAMK2N1, PRRX1, EZR, IGF1R, JUND, WNT5B, BMP1, FST, TBX3, PLAUR, PDLIM4, FZD8, LTBP3, ADAM12, IRS1, BHLHE40, FSCN1, HAS2, PIK3CD, LBH, PLAUR, PMEPA1                                          |
| Cell morphology                            | 1.65E-05-8.17E-03 | TCF4, FST, RALA, PVRL3, PLAUR, VEGFA, IRS1, EZR, PRRX1, BHLHE40, STMN4, MCAM, PLAU                                                                                                                                                              |
| Lipid metabolism                           | 5.5E-05-8.17E-03  | PTX3, FST, RALA, INSIG1, SERINC5, CLU, TNFRSF12A, VEGFA, SGPL1, BHLHE40, SPTLC2, PIK3CD, PLAU                                                                                                                                                   |
| Small molecule biochemistry                | 5.5E-05-8.17E-03  | PTX3, FST, RALA, INSIG1, SERINC5, GGH, CLU, PLAUR, TNFRSF12A, VEGFA, SGPL1, SPTLC2, BHLHE40, IRS1, IGF1R, HAS2, PIK3CD, PLAU, STX4                                                                                                              |
| Cell death                                 | 7.01E-05-8.17E-03 | TCF4, ATXN1, CLU, MELK, TNFRSF12A, VEGFA, TRIB1, SGPL1, CAMK2N1, MCAM, EZR, IGF1R, JUND, BMP1, FST, TBX3, PLAUR, PDLIM4, ADAM12, IRS1, BHLHE40, ITPR3, PIK3CD, PLAU, EFEMP1, PMEPA1                                                             |
| DNA replication, recombination, and repair | 3.05E-04-4.09E-03 | VEGFA, FST, IRS1, IGF1R, MUS81                                                                                                                                                                                                                  |
| Nucleic acid metabolism                    | 3.05E-04-3.05E-04 | VEGFA, FST, IRS1, IGF1R                                                                                                                                                                                                                         |
| Cellular assembly and organization         | 3.06E-04-8.17E-03 | PTX3, RALA, PVRL3, CLU, PLAUR, TNFRSF12A, PDLIM4, VEGFA, FSCN1, EZR, STMN4, HAS2, JUND, STX4, PLAU, FXYD5                                                                                                                                       |
| Cellular function and maintenance          | 3.06E-04-8.17E-03 | PTX3, TCF4, RALA, PVRL3, CLU, PLAUR, TNFRSF12A, PDLIM4, VEGFA, FZD8, MCAM, BHLHE40, FSCN1, EZR, STMN4, IGF1R, CHST3, HAS2, PIK3CD, STX4, PLAUR                                                                                                  |
| Antigen presentation                       | 4.6E-04-2.99E-03  | PTX3, VEGFA, PLAUR, PLAUR                                                                                                                                                                                                                       |
| Molecular transport                        | 5.68E-04-8.17E-03 | FST, RALA, GGH, PLAUR, VEGFA, SGPL1, BHLHE40, IRS1, SPTLC2, MCAM, ITPR3, IGF1R, HAS2, PIK3CD, JUND, STX4, PLAUR                                                                                                                                 |
| Cell cycle                                 | 5.91E-04-8.17E-03 | TCF4, SGSM1, TBX3, CLU, PLAUR, MELK, VEGFA, CAMK2N1, STMN4, IRS1, BHLHE40, JARID2, IGF1R, HAS2, JUND, PLAUR, MUS81                                                                                                                              |
| Cellular compromise                        | 8.86E-04-8.17E-03 | PTX3, VEGFA, SGPL1, RALA, FST, IGF1R, CLU, PLAUR, PIK3CD, STX4, PLAUR                                                                                                                                                                           |
| Cell signaling                             | 1.45E-03-7.34E-03 | PTX3, VEGFA, MCAM, IRS1, ITPR3, IGF1R, PLAUR, PIK3CD, PLAUR                                                                                                                                                                                     |
| Gene expression                            | 2.11E-03-3.12E-03 | FOXD1, TCF4, FST, ZNF281, TBX3, ATXN1, NAA15, VEGFA, FZD8, LRRFIP1, PRRX1, BHLHE40, JARID2, LBH, JUND                                                                                                                                           |
| Vitamin and mineral metabolism             | 2.5E-03-8.17E-03  | VEGFA, MCAM, IRS1, GGH, ITPR3, PLAUR, PIK3CD, PLAUR                                                                                                                                                                                             |
| Protein trafficking                        | 3.3E-03-3.3E-03   | VEGFA, PLAUR                                                                                                                                                                                                                                    |
| Amino acid metabolism                      | 4.09E-03-8.17E-03 | GGH                                                                                                                                                                                                                                             |
| Drug metabolism                            | 4.09E-03-8.17E-03 | PTX3, GGH, HAS2                                                                                                                                                                                                                                 |
| Free radical scavenging                    | 4.09E-03-4.09E-03 | CLU                                                                                                                                                                                                                                             |
| Protein synthesis                          | 4.15E-03-4.15E-03 | IRS1, ITPR3, IGF1R                                                                                                                                                                                                                              |
