# Supplementary material
Source: PubMed Central journal article supplement (PMC3875187)
Supplement: Supp_Table3.pdf [file Supp_Table3.pdf]

SUPPLEMENTARY TABLE S3. PHYSIOLOGICAL AND SYSTEM DEVELOPMENT AND FUNCTION

| <i>Category</i>                                         | <i>p-value</i>    | <i>Molecules</i>                                                                                                                                                                                                        |
|---------------------------------------------------------|-------------------|-------------------------------------------------------------------------------------------------------------------------------------------------------------------------------------------------------------------------|
| Tumor morphology                                        | 1.23E-07-7.56E-03 | VEGFA, ADAM12, MCAM, EZR, CLU, IGF1R, PLAUR, PLAU                                                                                                                                                                       |
| Tissue development                                      | 1.44E-06-8.17E-03 | FOXD1, TCF4, RALA, INSIG1, PVRL3, CLU, TNFRSF12A, VEGFA, SGPL1, EZR, PRRX1, CHST3, IGF1R, JARID2, JUND, STX4, FXYD5, WNT5B, BMP1, PTX3, HLX, FST, TBX3, PLAUR, LTBP3, ADAM12, IRS1, BHLHE40, HAS2, PIK3CD, EFEMP1, PLAU |
| Digestive system development and function               | 7.22E-06-8.17E-03 | VEGFA, SGPL1, LTBP3, FST, INSIG1, TBX3, PRRX1, PVRL3, CLU, PLAU                                                                                                                                                         |
| Embryonic development                                   | 7.23E-06-8.17E-03 | FOXD1, TCF4, INSIG1, PVRL3, CLU, TNFRSF12A, VEGFA, SGPL1, EZR, PRRX1, IGF1R, JARID2, JUND, WNT5B, PTX3, HLX, FST, TBX3, PLAUR, IRS1, BHLHE40, HAS2, PIK3CD, PLAU, EFEMP1                                                |
| Organ development                                       | 7.23E-06-8.17E-03 | FOXD1, HLX, TCF4, FST, INSIG1, TBX3, PVRL3, CLU, TNFRSF12A, VEGFA, SGPL1, BHLHE40, IRS1, EZR, PRRX1, CHST3, IGF1R, JARID2, HAS2, PIK3CD, JUND, PLAU, EFEMP1, WNT5B                                                      |
| Organismal development                                  | 7.23E-06-8.17E-03 | FOXD1, TCF4, INSIG1, PVRL3, CLU, TNFRSF12A, VEGFA, TRIB1, SGPL1, PRRX1, EZR, IGF1R, JARID2, JUND, MUS81, WNT5B, PTX3, HLX, FST, TBX3, PLAUR, LTBP3, BHLHE40, IRS1, ITPR3, HAS2, PIK3CD, EFEMP1, PLAU                    |
| Skeletal and muscular system development and function   | 1.65E-05-8.17E-03 | TCF4, HLX, FST, TBX3, CLU, PLAUR, TNFRSF12A, VEGFA, TRIB1, SGPL1, LTBP3, ADAM12, BHLHE40, IRS1, PRRX1, IGF1R, JUND, PLAU, WNT5B, BMP1                                                                                   |
| Cardiovascular system development and function          | 4.94E-05-8.17E-03 | PTX3, HLX, TBX3, PLAUR, TNFRSF12A, VEGFA, SGPL1, ADAM12, IRS1, PRRX1, IGF1R, HAS2, PLAUR, MUS81                                                                                                                         |
| Hair and skin development and function                  | 9.85E-05-8.17E-03 | VEGFA, TCF4, FST, IRS1, FSCN1, CLU, PLAUR, LBH, EFEMP1, PLAU                                                                                                                                                            |
| Immune cell trafficking                                 | 9.85E-05-4.09E-03 | PTX3, VEGFA, PLAUR, PIK3CD, STX4, PLAU                                                                                                                                                                                  |
| Organ morphology                                        | 9.85E-05-4.09E-03 | PTX3, HLX, FST, TBX3, PVRL3, CLU, PLAUR, VEGFA, ADAM12, PRRX1, BHLHE40, IGF1R, HAS2, PIK3CD, PLAU, EFEMP1, MUS81, BMP1                                                                                                  |
| Hematological system development and function           | 1.12E-04-8.17E-03 | PTX3, HLX, TCF4, FST, PLAUR, TNFRSF12A, VEGFA, FZD8, SGPL1, IRS1, BHLHE40, CHST3, IGF1R, PIK3CD, STX4, PLAU                                                                                                             |
| Reproductive system development and function            | 2.71E-04-8.17E-03 | VEGFA, PTX3, ADAM12, TBX3, IRS1, CLU, IGF1R, PLAUR, JUND, EFEMP1, PLAU                                                                                                                                                  |
| Connective tissue development and function              | 2.98E-04-8.17E-03 | FST, INSIG1, TBX3, CLU, PLAUR, TNFRSF12A, VEGFA, SGPL1, LTBP3, ADAM12, MCAM, EZR, IRS1, PRRX1, IGF1R, HAS2, JUND, EFEMP1, PLAU, WNT5B, BMP1                                                                             |
| Visual system development and function                  | 3.21E-04-5.42E-03 | VEGFA, FOXD1, IRS1, PRRX1, PVRL3, IGF1R, EFEMP1, PLAU, TNFRSF12A                                                                                                                                                        |
| Tissue morphology                                       | 3.42E-04-8.17E-03 | FST, TBX3, CLU, PLAUR, VEGFA, LTBP3, ADAM12, PRRX1, IRS1, BHLHE40, IGF1R, EFEMP1, PLAU, MUS81, BMP1                                                                                                                     |
| Renal and urological system development and function    | 6.67E-04-4E-03    | VEGFA, SGPL1, FOXD1, IRS1, EZR, PLAUR, EFEMP1, PLAU                                                                                                                                                                     |
| Organismal functions                                    | 2.26E-03-3.39E-03 | VEGFA, FST, IRS1, PLAUR, PLAU                                                                                                                                                                                           |
| Hematopoiesis                                           | 2.63E-03-4.09E-03 | VEGFA, FZD8, SGPL1, TCF4, HLX, FST, BHLHE40, IRS1, IGF1R, PIK3CD, TNFRSF12A                                                                                                                                             |
| Hepatic system development and function                 | 2.7E-03-8.17E-03  | VEGFA, TNFRSF12A                                                                                                                                                                                                        |
| Auditory and vestibular system development and function | 3.62E-03-3.95E-03 | INSIG1, PRRX1, PLAU                                                                                                                                                                                                     |
| Behavior                                                | 4.09E-03-4.09E-03 | PLAU                                                                                                                                                                                                                    |
| Endocrine system development and function               | 4.09E-03-8.03E-03 | FST, BHLHE40, CLU, IGF1R                                                                                                                                                                                                |

(continued)

SUPPLEMENTARY TABLE S3. (CONTINUED)

| <i>Category</i>                             | <i>p-value</i>    | <i>Molecules</i>                                         |
|---------------------------------------------|-------------------|----------------------------------------------------------|
| Lymphoid tissue structure and development   | 4.09E-03-6.73E-03 | <i>VEGFA, FST, BHLHE40, PIK3CD</i>                       |
| Nervous system development and function     | 4.09E-03-8.17E-03 | <i>VEGFA, TCF4, FOXD1, TBX3, IRS1, CHST3, IGF1R, CLU</i> |
| Cell-mediated immune response               | 5.89E-03-5.89E-03 | <i>VEGFA, FZD8, TCF4, BHLHE40, IGF1R, CHST3, PIK3CD</i>  |
| Respiratory system development and function | 8.17E-03-8.17E-03 | <i>VEGFA</i>                                             |
