# Supplementary material
Source: PubMed Central journal article supplement (PMC3875187)
Supplement: Supp_Table5.pdf [file Supp_Table5.pdf]

SUPPLEMENTARY TABLE S5. CANONICAL PATHWAY OF GENES REGULATED BY HUMAN MESENCHYMAL STEM CELLS IN RESPONSE TO 10% UNIAXIAL CYCLIC TENSILE STRAIN IN THREE-DIMENSIONAL COLLAGEN CULTURE

| <i>Canonical pathways</i>                                                       | <i>-log (p-value)</i> | <i>Ratio</i> | <i>Molecules</i>                         |
|---------------------------------------------------------------------------------|-----------------------|--------------|------------------------------------------|
| Human embryonic stem cell pluripotency                                          | 3.75E+00              | 3.33E-02     | FZD8, TCF4, PIK3CD, WNT5B, BMP1          |
| Basal cell carcinoma signaling                                                  | 3.72E+00              | 5.48E-02     | FZD8, TCF4, WNT5B, BMP1                  |
| Ovarian cancer signaling                                                        | 3.69E+00              | 3.52E-02     | VEGFA, FZD8, TCF4, PIK3CD, WNT5B         |
| Glioblastoma multiforme signaling                                               | 3.43E+00              | 2.98E-02     | FZD8, ITPR3, IGF1R, PIK3CD, WNT5B        |
| Role of NANOG in mammalian embryonic stem cell pluripotency                     | 2.99E+00              | 3.51E-02     | FZD8, PIK3CD, WNT5B, BMP1                |
| Glioma invasiveness signaling                                                   | 2.79E+00              | 5.00E-02     | PLAUR, PIK3CD, PLAU                      |
| Role of osteoblasts, osteoclasts, and chondrocytes in rheumatoid arthritis      | 2.71E+00              | 2.09E-02     | FZD8, TCF4, PIK3CD, WNT5B, BMP1          |
| Molecular mechanisms of cancer                                                  | 2.59E+00              | 1.59E-02     | FZD8, TCF4, RALA, IRS1, PIK3CD, BMP1     |
| Growth hormone signaling                                                        | 2.57E+00              | 4.00E-02     | IRS1, IGF1R, PIK3CD                      |
| Colorectal cancer metastasis signaling                                          | 2.54E+00              | 1.95E-02     | VEGFA, FZD8, TCF4, PIK3CD, WNT5B         |
| Role of Wnt/GSK-3 $\beta$ signaling in the pathogenesis of influenza            | 2.40E+00              | 3.70E-02     | FZD8, TCF4, WNT5B                        |
| Nitric oxide signaling in the cardiovascular system                             | 2.38E+00              | 3.00E-02     | VEGFA, ITPR3, PIK3CD                     |
| Axonal guidance signaling                                                       | 2.29E+00              | 1.40E-02     | VEGFA, FZD8, ADAM12, PIK3CD, WNT5B, BMP1 |
| Factors promoting cardiogenesis in vertebrates                                  | 2.27E+00              | 3.16E-02     | FZD8, TCF4, BMP1                         |
| Mouse embryonic stem cell pluripotency                                          | 2.16E+00              | 3.03E-02     | FZD8, TCF4, PIK3CD                       |
| IGF-1 signaling                                                                 | 2.12E+00              | 2.83E-02     | IRS1, IGF1R, PIK3CD                      |
| Role of macrophages, fibroblasts, and endothelial cells in rheumatoid arthritis | 2.10E+00              | 1.50E-02     | VEGFA, FZD8, TCF4, PIK3CD, WNT5B         |
| IL-9 signaling                                                                  | 2.07E+00              | 5.00E-02     | IRS1, PIK3CD                             |
| Coagulation system                                                              | 2.05E+00              | 5.26E-02     | PLAUR, PLAU                              |
| Pancreatic adenocarcinoma signaling                                             | 2.03E+00              | 2.52E-02     | VEGFA, RALA, PIK3CD                      |
| Role of tissue factor in cancer                                                 | 2.00E+00              | 2.63E-02     | VEGFA, PLAUR, PIK3CD                     |
| Corticotropin releasing hormone signaling                                       | 1.97E+00              | 2.21E-02     | VEGFA, ITPR3, JUND                       |
| Insulin receptor signaling                                                      | 1.83E+00              | 2.21E-02     | IRS1, PIK3CD, STX4                       |
| EGF signaling                                                                   | 1.82E+00              | 3.85E-02     | ITPR3, PIK3CD                            |
| eNOS signaling                                                                  | 1.79E+00              | 1.99E-02     | VEGFA, ITPR3, PIK3CD                     |
| PI3K signaling in B lymphocytes                                                 | 1.78E+00              | 2.10E-02     | IRS1, ITPR3, PIK3CD                      |
| Myc-mediated apoptosis signaling                                                | 1.61E+00              | 3.28E-02     | IGF1R, PIK3CD                            |
| Estrogen-dependent breast cancer signaling                                      | 1.60E+00              | 2.86E-02     | IGF1R, PIK3CD                            |
| Aldosterone signaling in epithelial cells                                       | 1.58E+00              | 1.73E-02     | ITPR3, PIK3CD, DNAJC7                    |
| Role of JAK1 and JAK3 in $\gamma$ c cytokine signaling                          | 1.57E+00              | 2.99E-02     | IRS1, PIK3CD                             |
| Nonsmall cell lung cancer signaling                                             | 1.54E+00              | 2.53E-02     | ITPR3, PIK3CD                            |
| Wnt/ $\beta$ -catenin signaling                                                 | 1.50E+00              | 1.74E-02     | FZD8, TCF4, WNT5B                        |
| IL-4 signaling                                                                  | 1.50E+00              | 2.74E-02     | IRS1, PIK3CD                             |
| Renal cell carcinoma signaling                                                  | 1.48E+00              | 2.70E-02     | VEGFA, PIK3CD                            |
| BMP signaling pathway                                                           | 1.45E+00              | 2.50E-02     | FST, BMP1                                |
| Prolactin signaling                                                             | 1.44E+00              | 2.50E-02     | IRS1, PIK3CD                             |
| NRF2-mediated oxidative stress response                                         | 1.43E+00              | 1.57E-02     | JUND, PIK3CD, DNAJC7                     |
| VEGF family ligand-receptor interactions                                        | 1.41E+00              | 2.38E-02     | VEGFA, PIK3CD                            |
| Role of NFAT in cardiac hypertrophy                                             | 1.41E+00              | 1.43E-02     | ITPR3, IGF1R, PIK3CD                     |
| Clathrin-mediated endocytosis Signaling                                         | 1.40E+00              | 1.54E-02     | VEGFA, CLU, PIK3CD                       |
| Acute myeloid leukemia signaling                                                | 1.40E+00              | 2.44E-02     | TCF4, PIK3CD                             |
| ILK signaling                                                                   | 1.40E+00              | 1.56E-02     | VEGFA, IRS1, PIK3CD                      |
| mTOR signaling                                                                  | 1.36E+00              | 1.42E-02     | VEGFA, IRS1, PIK3CD                      |
| Sphingolipid metabolism                                                         | 1.36E+00              | 1.82E-02     | SGPL1, SPTLC2                            |
