# Supplementary material
Source: PubMed Central journal article supplement (PMC3875187)
Supplement: Supp_Table6.pdf [file Supp_Table6.pdf]

SUPPLEMENTARY TABLE S6. OVERLAPPED GENES BETWEEN HUMAN MESENCHYMAL STEM CELLS FROM OSTEOPOROTIC DONORS AND HUMAN ADIPOSE-DERIVED STEM CELLS FROM PREVIOUS STUDY<sup>19</sup>

| <i>Symbol</i>  | <i>Entrez gene name</i>                                      | <i>hMSC from osteoporotic donors</i> |                | <i>Previous study in hASC<sup>19</sup></i> |                |
|----------------|--------------------------------------------------------------|--------------------------------------|----------------|--------------------------------------------|----------------|
|                |                                                              | <i>Fold change</i>                   | <i>p-Value</i> | <i>Fold change</i>                         | <i>p-Value</i> |
| <i>PMEPA1</i>  | Prostate transmembrane protein, androgen induced 1           | 2.496                                | 5.46E-11       | 6.908                                      | 1.20E-03       |
| <i>PDLIM4</i>  | PDZ and LIM domain 4                                         | 2.414                                | 4.07E-09       | 4.061                                      | 3.30E-06       |
| <i>ADAM12</i>  | ADAM metalloproteinase domain 12                             | 1.737                                | 1.21E-11       | 2.531                                      | 7.74E-03       |
| <i>MICALL1</i> | MICAL-like 1                                                 | 1.859                                | 3.00E-05       | 2.112                                      | 6.07E-12       |
| <i>VEGFA</i>   | Vascular endothelial growth factor A                         | 1.667                                | 1.16E-07       | 1.894                                      | 3.60E-03       |
| <i>INSIG1</i>  | Insulin induced gene 1                                       | 1.605                                | 7.45E-07       | 1.737                                      | 3.22E-03       |
| <i>JUND</i>    | jun D proto-oncogene                                         | 1.351                                | 3.89E-06       | 1.391                                      | 5.90E-04       |
| <i>RALA</i>    | v-ral simian leukemia viral oncogene homolog A (ras related) | 1.402                                | 6.33E-03       | 1.382                                      | 7.27E-06       |

hMSC, human mesenchymal stem cells.
